# Supplementary material for: Digitalization and trade participation of SMEs
Source: Springer Nature journal article supplement (doi:10.1007/s11187-023-00799-7), 2023-07-05
Supplement: MOESM1 [file 25579004]

**ONLINE APPENDIX**

**TFP Estimation**

To estimate the TFP, we assume a Cobb-Douglas production function:

(a1)

where *yit*, *lit*, , and *mit*, stand for the firm’s *i* logarithm of output, labor, non-ICT capital, ICT capital, and materials. In addition, *ωit* is the firm’s productivity, and *eit* is the error term.

Considering that digitalization enhances productivity implies departing from the standard approach that considers that productivity follows an exogenous Markov process (Olley & Pakes, 1996). Instead, in the spirit of Doraszeski and Jaumandreu (2013), we assume that productivity can be modelled as an endogenous Markov process that depends on the digitalization index and a random shock:

(a.2)

where *g*(.) is an unknown function, and is a random shock.

The estimation of equation (a.1) by ordinary least squares (OLS) causes biased and inconsistent estimates because the choice of (variable) inputs depends on productivity, *ωit* (which is only observed by the firm). To address this problem, we apply the GMM estimation proposed by Wooldridge (2009), which builds on Olley and Pakes (1996) and Levinsohn and Petrin (2003). Hence, first following Levinsohn and Petrin (2003) we assume that the demand for materials is a function of firms' ICT and non-ICT capital, and productivity. Such demand is monotonic and strictly increasing in productivity, and, under certain conditions, it can be inverted to obtain: . Then, substituting into (a.1) we get the first equation to estimate:

(a.3)

Since *ht*(.) is an unknown function, the identification of the coefficients of capital and materials requires of an additional equation. This equation is the first-order endogenous Markov process described by (a.3). Considering that , equation (a.3) can be rewritten as ; and plugging this into (a.1), we obtain the second equation to estimate:

(a.4)

where *gt* (.) is an unknown function[[1]](#footnote-1), and is a composed error term. Following Wooldridge (2009), equations (a.3) and (a.4) are jointly estimated for each of the 10 industries by GMM, employing the appropriate instruments and moment conditions for each equation[[2]](#footnote-2). Table O1 reports output elasticities for each industry.

**Firms’ Markups**

To obtain firms’ markups, we use the method of De Loecker and Warzynski (2012). This method does not require any assumptions about the shape of the demand faced by firms or how they compete. The only assumptions required are that: i) there is at least one variable input, and ii) firms are cost minimizers. From the first order condition of the cost minimization with respect to the variable input, one can compute the firm’s markup (*μ*). Here, we use intermediate inputs as the variable factor of production, given that labor in Spain may be subject to more rigidities. Hence, the firm’s markup can be obtained as the ratio between the output elasticity of the intermediate inputs (*βm*), obtained from the estimation of equation (a.1), and the cost share of intermediate inputs relative to total sales , that comes from the data. More specifically,

(a.5)

TABLE O1

*Results of the estimation of the production function for SMEs*

| *Industry* | *l* | *kNIT* | *kIT* | *m* | *Obs.* |
| --- | --- | --- | --- | --- | --- |
| 1. Metals and metal products | 0.233*** | 0.055*** | 0.006** | 0.688*** | 1734 |
|  | (0.011) | (0.009) | (0.003) | (0.016) |  |
|  |  |  |  |  |  |
| 2. Non-metallic minerals | 0.212*** | 0.045*** | 0.014*** | 0.728*** | 798 |
|  | (0.015) | (0.014) | (0.005) | (0.025) |  |
|  |  |  |  |  |  |
| 3. Chemical products | 0.237*** | 0.049*** | 0.009*** | 0.717*** | 1334 |
|  | (0.012) | (0.011) | (0.003) | (0.021) |  |
|  |  |  |  |  |  |
| 4. Agric. And ind. Machinery | 0.202*** | 0.039*** | 0.023*** | 0.701*** | 765 |
|  | (0.015) | (0.015) | (0.006) | (0.022) |  |
|  |  |  |  |  |  |
| 5. Electrical goods | 0.222*** | 0.072*** | 0.045*** | 0.634*** | 695 |
|  | (0.014) | (0.016) | (0.006) | (0.031) |  |
|  |  |  |  |  |  |
| 6. Transport equipment | 0.202*** | 0.082*** | 0.005 | 0.744*** | 542 |
|  | (0.019) | (0.017) | (0.008) | (0.028) |  |
|  |  |  |  |  |  |
| 7. Food, drink and tobacco | 0.106*** | 0.080*** | 0.014*** | 0.714*** | 1695 |
|  | (0.008) | (0.009) | (0.003) | (0.023) |  |
|  |  |  |  |  |  |
| 8. Textile, leather and shoes | 0.362*** | 0.080*** | 0.012** | 0.450*** | 1213 |
|  | (0.016) | (0.017) | (0.006) | (0.039) |  |
|  |  |  |  |  |  |
| 9. Timber and furniture | 0.230*** | 0.031*** | 0.019*** | 0.679*** | 1116 |
|  | (0.011) | (0.010) | (0.004) | (0.022) |  |
|  |  |  |  |  |  |
| 10. Paper and printing products | 0.275*** | 0.122*** | 0.010** | 0.460*** | 1012 |
|  | (0.013) | (0.016) | (0.005) | (0.056) |  |

*Notes:* Estimates of the input coefficients from equation (a1) are shown for different industries using the GMM estimation proposed by Wooldridge (2009). The dependent variable is the log of gross output. Each row represents a separate regression. Robust standard errors are reported in parenthesis. ***denotes level of significance at 1%,** at 5%, * at 10%.

**Additional robustness checks**

In addition to the robustness tests presented in Table 5, we also estimate two static FE conditional logit models (Chamberlain, 1980). Here we examine the impact of digitalization by exploiting with-firm variation in export and import status over time. Hence, the model is estimated on the sample of SMEs experiencing a change in trade status at least once during the sample period. This implies a considerable reduction in the number of observations as many SMEs do not trade over the sample period. This is due to the high persistence in trade activities induced by high sunk costs (Roberts & Tybout, 1997), which suggest that the random effects may be more appropriate. The results are presented in TABLE O2 and to compare the estimates we also estimate a linear probability model with the restricted logit sample. FE logit models are ill-suited for conducting marginal effects analysis as most programs calculate such effects under the assumption that fixed effects are zero, which is unrealistic and may cause problems with the marginal effect estimates (Kemp & Silva, 2016). Therefore, in columns (1) and (2) we report the average (semi-) elasticities instead (see Kemp & Silva, 2016).

TABLE O2

Results from a FE logit and a linear probability FE.

|  | FE Logit | | LP-FE | |
| --- | --- | --- | --- | --- |
| *Dependent var.* | Export | Import | Export | Import |
|  | (1) | (2) | (3) | (4) |
| DIGt | 0.896*** | 0.327 | 0.373*** | 0.141 |
|  | (0.291) | (0.225) | (0.126) | (0.102) |
| TFPt-1 | 0.638** | 0.808*** | 0.251** | 0.316*** |
|  | (0.257) | (0.223) | (0.111) | (0.097) |
| Firm controls | *Yes* | *Yes* | *Yes* | *Yes* |
| Firm FE | *Yes* | *Yes* | *Yes* | *Yes* |
| Observations | 1,980 | 2,658 | 1,980 | 2,658 |
| Controls | -716.82 | -978.01 | -1002.77 | -1369.70 |
| Observations | 1,978 | 2,658 | 1,978 | 2,658 |
| Log-Likelihood | -716.36 | -978.01 | -1002.36 | -1369.70 |

Notes: In (1) and (2) we report average (semi)-elasticities using the *aextlogit* Stata module, while in (3) and (4) we report the estimated coefficients of the variables of interest. In (1) and (2) we estimate two independent static conditional FE logit models (FE Logit), while in (3) and (4) we estimate a static linear probability FE model (LP-FE). All specifications include the same control variables as in Table 4 of the main text together with industry and year dummies. * Significant at 10%, ** significant at 5%, *** significant at 1%.

More specifically, the results in (1) imply that by increasing DIG in one unit, the probability of exporting increases by 88.7%. This effect can be compared with the coefficient in column (3) that implies that if DIG changes by 1 unit, the probability of exporting changes by 37.3 percentage points, moving from 59% (the mean export participation rate in this sample) to 96%. In general, the influence of digitalization on trade decisions in this sample, whether direct or indirect, aligns with the baseline findings, but with much greater impact. Although the direct impact of DIG on imports is found to be statistically insignificant, we believe that the conditional logit estimates are upward biased due to sample selection.

**The Intensive Margin of Exports**

Although our interest lies on the facilitating role of DTs for SMEs in entering foreign markets, in this section we delve into the relationship between digitalization and export intensity, which is measured as the share of the firm's exports relative to total sales. Modeling the export intensive margin, and consistent with the self-selection hypothesis (Melitz, 2003), requires accounting for the non-random selection that leads some firms to export. To this end, we estimate a generalized two-part fractional model (Wulff, 2019). Here, we model the selection equation (export participation) with a dynamic RE probit model, as in the main analysis, and the export-to-sales ratio with a Generalized Linear Model (GLM). The GLM is considered more appropriate when the dependent variable is a share, as in the case of the export intensity (Papke & Wooldridge, 2008)[[3]](#footnote-3). The identification of the model requires an exclusion restriction, i.e., at least one factor should be identified that influences the participation into exporting but not export intensity. We use the previous export status as the exclusion restriction on the grounds that it is a proxy for sunk costs of entering international markets and therefore only affects the export extensive margin (see Brancati *et al*., 2018). Moreover, we also allow for the joint decision between exporting and importing. Hence, the selection process is specified as described in equation (4) in the main text, while the intensive margin (*EI*) is modeled as follows:

(a.6)

In equation (a.6), the parameter informs about the direct effect of *DIG* on the export intensity, while the parameter informs about the indirect effect accruing through the TFP channel, conditional on digitalization affecting TFP. Following Añón Higón & Bonvin (2022), we include in *xit* the same variables considered to influence the decision to trade. As a robustness check, we also present results from a dynamic Type II-Tobit model with the Heckman two-stage procedure, which also allows for the two processes, the selection into exports and the intensity, to be correlated (Heckman, 1979). The consistency of the Type II-Tobit model however crucially depends on the assumptions of normality and homoscedasticity. In this case we also do not take into account the interdependence between the export and import participation decision.

The determinants of export intensity are reported in Table O3. Results are presented in terms of average marginal effects and their respective standard errors. As explained above, we proceed with a generalized two-part fractional model and a Type II-Tobit model for robustness. Note that we do not include the selection process to keep the attention on the export intensity. In the case of the two-part fractional model, it is important to highlight that in the selection equation we consider that exports and imports are interdependent decisions.

TABLE O3

*The impact of digitalization on the intensive margin of exporting*

|  | Two-part fractional | | Tobit-II Heckman | |
| --- | --- | --- | --- | --- |
| *Dependent var.* | Export intensity | Export intensity | Export intensity | Export intensity |
|  | (2) | (3) | (4) | (5) |
| DIGt | -0.004 |  | -0.004 |  |
|  | (0.009) |  | (0.012) |  |
| ICTt |  | -0.004 |  | 0.003 |
|  |  | (0.009) |  | (0.011) |
| Automationt |  | -0.001 |  | -0.004 |
|  |  | (0.005) |  | (0.006) |
| TFPt-1 | 0.016* | 0.016* | 0.019* | 0.019* |
|  | (0.009) | (0.009) | (0.011) | (0.011) |
| Export intensityt-1 | 0.491*** | 0.491*** | 0.802*** | 0.802*** |
|  | (0.011) | (0.011) | (0.019) | (0.020) |
| Relative Markupt-1 | -0.017** | -0.017** | -0.013 | -0.013 |
|  | (0.007) | (0.007) | (0.009) | (0.009) |
| R&D t-1 | 0.008*** | 0.008*** | 0.007* | 0.007* |
|  | (0.003) | (0.003) | (0.004) | (0.004) |
| Human Capitalt-1 | -0.007 | -0.007 | -0.003 | -0.003 |
|  | (0.010) | (0.011) | (0.012) | (0.012) |
| Age t-1 | -0.001 | -0.001 | 0.001 | 0.001 |
|  | (0.002) | (0.002) | (0.003) | (0.003) |
| Size t-1 | 0.011 | 0.011 | 0.033 | 0.032 |
|  | (0.028) | (0.028) | (0.031) | (0.031) |
| Foreign Capital t-1 | 0.007* | 0.007* | 0.010* | 0.010* |
|  | (0.004) | (0.004) | (0.005) | (0.005) |
| Recessive Market t-1 | 0.004 | 0.004 | 0.002 | 0.002 |
|  | (0.003) | (0.003) | (0.004) | (0.004) |
| Expansive Market t-1 | 0.001 | 0.001 | 0.003 | 0.003 |
|  | (0.004) | (0.004) | (0.004) | (0.004) |
| Competitors t-1 | -0.007* | -0.007* | -0.005 | -0.005 |
|  | (0.004) | (0.004) | (0.005) | (0.005) |
| Appropriability t-1 | -0.002 | -0.002 | -0.002 | -0.002 |
|  | (0.006) | (0.006) | (0.008) | (0.008) |
| External Finance t-1 | -0.001 | -0.001 | -0.001 | -0.001 |
|  | (0.000) | (0.000) | (0.001) | (0.001) |
| Internal Finance t-1 | -0.000 | -0.000 | -0.000 | -0.000 |
|  | (0.001) | (0.001) | (0.001) | (0.001) |
| Initial conditions | Yes | Yes | Yes | Yes |
| Mundlak means | Yes | Yes | Yes | Yes |
| Observations | 9,143 | 9,143 | 9,182 | 9,182 |

*Notes:* The estimates correspond to the average marginal effects and their corresponding standard errors in parenthesis. All specifications include industry and year dummies. The selection equation and the export-intensity equation contain the terms required to account for initial conditions and for the endogeneity of the lagged dependent variable. We also account for the interdependence between the export and imports participation decision. The export and the import participation equations are not reported. * Significant at 10%, ** significant at 5%, *** significant at 1%.

First, in columns (1) and (2) of Table O3 we consider the results of the generalized two-part fractional model. In column (1), we assess the joint impact of digitalization (DIG), and in column (2), we separate ICT from automation technologies. In both columns, DTs appear to be statistically insignificant in explaining export intensity directly, but they still play a significant indirect role through the productivity channel, albeit at 10%. To ensure the robustness of our results, we also present estimates of a dynamic Tobit II-Heckman model. In this case, we do not allow for interdependence between the decision of exporting and importing. The same variables are used in the Heckman model and the two-part model. Likewise, the results in columns (3) and (4) confirm those obtained with the two-part model. This consistency between the models is a sign of the robustness of the results. We also find that the share of foreign sales in the previous period has an important impact on the current intensive margin. Moreover, R&D, market power, and foreign capital also influence the SME’s intensive export margin.

All in all, our findings are in line with those of Añón Higón and Bonvin (2022). Thus, digitalization plays a direct role in explaining export and import participation, but not in explaining the share of foreign sales, for which, however, the indirect TFP channel continues to play a positive role. Once firms start exporting, digitalization allows the share of foreign sales to expand only through TFP gains. We suspect that this is because DTs can increase domestic sales proportionally and therefore the impact on the share of foreign sales is not significant for the average firm. According to Hagsten and Kotnik (2017), this may also be because a critical minimum level of digitalization has not yet been reached at which the relationship becomes positive.

**References**

Añón Higón, D., & Bonvin, D. (2022), Information and communication technologies and firms’ export performance. *Industrial and Corporate Change*, 31(4), 955-979. https://doi.org/10.1093/icc/dtac017

Chamberlain, G. (1980), Analysis of covariance with qualitative data. *The Review of Economic Studies*, *47*(1), 225-238. https://doi.org/10.2307/2297110

De Loecker, J., & Warzynski, F. (2012), Markups and firm-level export status. *American Economic Review*, 102(6), 2437-71. DOI: 10.1257/aer.102.6.2437

Doraszelski, U., & Jaumandreu, J. (2013), R&D and productivity: Estimating endogenous productivity. *The Review of Economic Studies*, *80*(4), 1338-1383. <https://doi.org/10.1093/restud/rdt011>

Hagsten, E., & Kotnik, P. (2017), ICT as facilitator of internationalisation in small- and medium-sized firms. *Small Busisness Economics,* 48, 431–446. https://doi.org/10.1007/s11187-016-9781-2

Heckman, J. J. (1979), Sample selection bias as a specification error. *Econometrica: Journal of the Econometric Society*, 47(1), 153-161. <https://doi.org/10.2307/1912352>

Kemp, G. and Silva, J. S. (2016). ‘Partial effects in fixed-effects models’ *United Kingdom Stata Users' Group Meetings 2016*, Stata Users Group. Available at: http://EconPapers.repec.org/RePEc:boc:usug16:06

Levinsohn, J., & Petrin, A. (2003), Estimating production functions using inputs to control for unobservables. *The Review of Economic Studies*, *70*(2), 317-341. <https://doi.org/10.1111/1467-937X.00246>

Melitz, M. J. (2003), The impact of trade on intra‐industry reallocations and aggregate industry productivity. *Econometrica,* 71(6),1695-1725. https://doi.org/10.1111/1468-0262.00467

Olley S., & Pakes A. (1996), The dynamics of productivity in the telecommunications equipment industry. *Econometrica*, 64,1263-1298. https://doi.org/10.2307/2171831

Papke, L. E., & Wooldridge, J. M. (2008). Panel data methods for fractional response variables with an application to test pass rates. *Journal of Econometrics*, *145*(1-2), 121-133. https://doi.org/10.1016/j.jeconom.2008.05.009

Roodman, D. (2011), Fitting fully observed recursive mixed-process models with cmp. *The Stata Journal*, 11(2): 159-206. https://doi.org/10.1177/1536867X1101100202

Wooldridge, J. M. (2009), On estimating firm-level production functions using proxy variables to control for unobservables. *Economics Letters*, *104*(3), 112-114. https://doi.org/10.1016/j.econlet.2009.04.026

Wulff, J. N. (2019). Generalized two-part fractional regression with cmp. *The Stata Journal*, *19*(2), 375-389. https://doi.org/10.1177/1536867X19854017

1. We proxy *ht(.)* and *gt*(.) by a third-degree polynomial in their arguments. [↑](#footnote-ref-1)
2. We follow Doraszelski and Jaumandreu (2013) and do not account for sample selection by modelling a firm’s exit decision. [↑](#footnote-ref-2)
3. To estimate the generalized two-part fractional model, we use the conditional mixed-process framework implemented by Stata's *cmp* command (Roodman, 2011). This approach also allows us to take into account the interdependence between export and import participation decisions. [↑](#footnote-ref-3)
